# Supplementary material
Source: Springer Nature journal article supplement (https://www.springermedizin.de/resource/supplementary/13058_2009_2551_MOESM12_ESM.pdf/9701684)

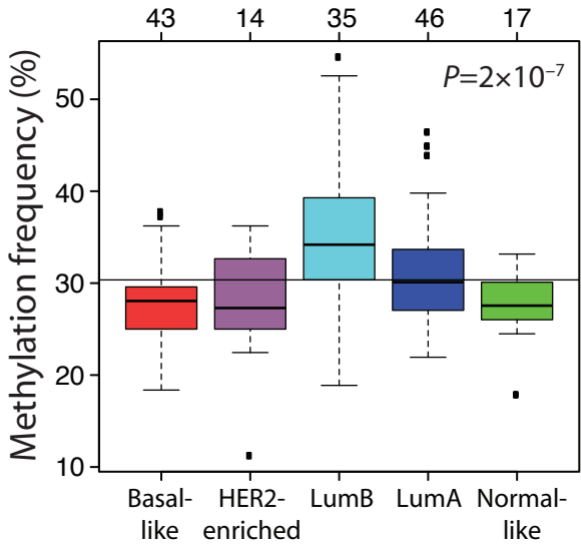

Supplement: MOESM12 [file 9701684]
